# Supplementary material
Source: PubMed Central journal article supplement (PMC6305003)
Supplement: pnas.1814048115.sapp.pdf [file pnas.1814048115.sapp.pdf]

## Supplementary Information for

Calditol-linked membrane lipids are required for acid tolerance in  
*Sulfolobus acidocaldarius*

Zhirui Zeng, Xiao-Lei Liu, Jeremy H. Wei, Roger E. Summons, and Paula V. Welander

Paula V. Welander

Email: [welander@stanford.edu](mailto:welander@stanford.edu)

### **This PDF file includes:**

Supplementary Methods  
Figs. S1 to S4  
Tables S1 to S6  
References for SI reference citations

## Supplemental Methods

**Molecular Biology Techniques.** Oligonucleotides were purchased from Integrated DNA Technologies. Genomic DNA was isolated using the DNeasy Blood and Tissue Kit (Qiagen). PCR was performed according to the manufacturer's protocol using Taq DNA polymerase or Phusion high-fidelity DNA Polymerase (New England Biolabs). The GeneJET Plasmid Miniprep Kit (Thermo Scientific) was used for isolation of plasmid DNA from *E. coli*. The GeneJET gel extraction and PCR purification kits were used for purification of DNA fragments during cloning procedures. DNA sequences were confirmed by sequencing at ELIM Biopharm (Hayward, CA).

Plasmids were constructed by sequence and ligation independent cloning (SLIC) (1). For the *saci\_1489* deletion construct, 729 bp of the *saci\_1489* upstream and 714 bp of the downstream regions were PCR amplified with primers Z001F/R and Z002F/R, respectively, and inserted into the *NcoI* and *BamHI* restriction sites of pSVA407 (2) to yield plasmid pSVA407-*saci\_1489*UD. For the *saci\_0343* deletion construct, 700 bp of the *saci\_0343* upstream and 700 bp of downstream regions were PCR amplified with primers Z004F/R and Z005F/R, respectively, and inserted into the *NcoI* and *BamHI* restriction sites of pSVA407 to yield plasmid pSVA407-*saci\_0343*UD. For the complementation construct, *saci\_1489* was PCR amplified from genomic DNA with primers Z003F/R and inserted into the *NcoI* and *XhoI* sites of the self-replicating plasmid pSVA1561 (3) to yield pSVA1561-*saci\_1489*. This plasmid contains a maltose inducible promoter for inducible expression of the cloned gene.

Electrocompetent *E. coli* and *S. acidocaldarius* cells were transformed by electroporation using a Micro-Pulser Electroporator (BioRad) with the program Ec1 (1.8 kv, 1 pulse for a 0.1 cm cuvette). *S. acidocaldarius* competent cells were prepared as described in Wagner et al. (2). Before transformation of *S. acidocaldarius*, all plasmids were methylated through *E. coli* ER1821 bearing the plasmid pM.EsaBC4I, and 1.5 µg of methylated plasmid DNA was used to transform 50 µL of competent cells. Electroporated *S. acidocaldarius* cells were recovered in 1

mL Brock medium supplemented with 0.1% NZ-Amine and 0.2% sucrose at 75°C for 1.5 hour. Cells were plated on the proper selective medium, plates were sealed in plastic bags, and incubated at 75°C for 5-7 days.

**Construction of *S. acidocaldarius* mutants.** The deletion construct (pSVA407-*saci\_1489*UD or pSVA407-*saci\_0343*UD) was transformed into the uracil auxotroph *S. acidocaldarius* MW001 and plated on solid medium lacking uracil to select for cells that had integrated the entire plasmid at the locus of interest. Integrants were visualized by spraying the resulting colonies with 5 mg/mL 5-bromo-4-chloro-3-indolyl- $\beta$ -D-galactoside (X-gal). Positive colonies were single colony purified, inoculated into liquid medium, and grown to mid-exponential phase at 75°C. To induce loss of the integrated plasmid and potentially delete the gene of interest, 50  $\mu$ L of culture were spread on plates containing 10  $\mu$ g/mL uracil and 100  $\mu$ g/mL 5-fluoroorotic acid (5-FOA) and incubated at 75°C for 5-7 days. 5-FOA is a fluorinated derivative of a pyrimidine precursor which can be converted to a toxic metabolite, 5-fluorouracil, by the orotidine 5'-phosphate decarboxylase encoded on the selection plasmid (*pyrEF*). Selection on 5-FOA forces the loss of the plasmid from the chromosome and this will produce either the wild type locus or result in the deletion of the gene of interest. Potential  $\Delta$ *saci\_1489* or  $\Delta$ *saci\_0343* mutant colonies were screened by PCR with primers Z006F/R or Z007F/R, respectively, and positive clones were verified by sequencing.

**Lipid extractions.** Frozen cell pellets were freeze-dried and 30 mg of this lyophilized cell mass was homogenized with a laboratory spatula. An internal quantification standard, C<sub>46</sub> GDGT (500ng), was added to the ground pellets (4) prior to extracting in a 50 mL Teflon tube by sonicating first in 5 ml of methanol (MeOH) and then in 5 mL of 1:1 (vol/vol) MeOH and dichloromethane (DCM). Each sonication was performed in an ultrasonic bath for 15 min at room temperature, and samples were centrifuged at 4500 $\times$ g for 10 min after sonication. The two supernatants were combined and filtered through 0.45- $\mu$ m PTFE filter and dried under a stream

of nitrogen gas (N<sub>2</sub>) to yield the “non-hydrolyzed fraction” containing intact polar GDGTs. The remaining cell pellet was resuspended in 10 ml of DCM and transferred to a 40 mL glass vial and dried under N<sub>2</sub>. The dried cells were then acid hydrolyzed with 5 mL of 10% hydrochloric acid (HCl) in MeOH (vol/vol) at 70°C for 8 hours. Subsequently, 10 mL of DCM and 10 mL of Nanopure water were added and the mixture was transferred to a 50 mL Teflon tube. The sample was centrifuged for 10 min at 2800×g to separate the organic and inorganic phases. The top layer was removed and the bottom organic layer was dried under N<sub>2</sub> to yield the “acid hydrolyzed fraction” containing the GDCTs and the core GDGTs. For acetylation one aliquot of lipid extract was transferred into a 2 ml vial and dried with a stream of N<sub>2</sub>, and then added 100 µL pyridine and 100 µL acetic anhydride to react at 60 °C for 2 hours. The reaction solution was then dried with a stream of N<sub>2</sub> and dissolved again in MeOH for injection.

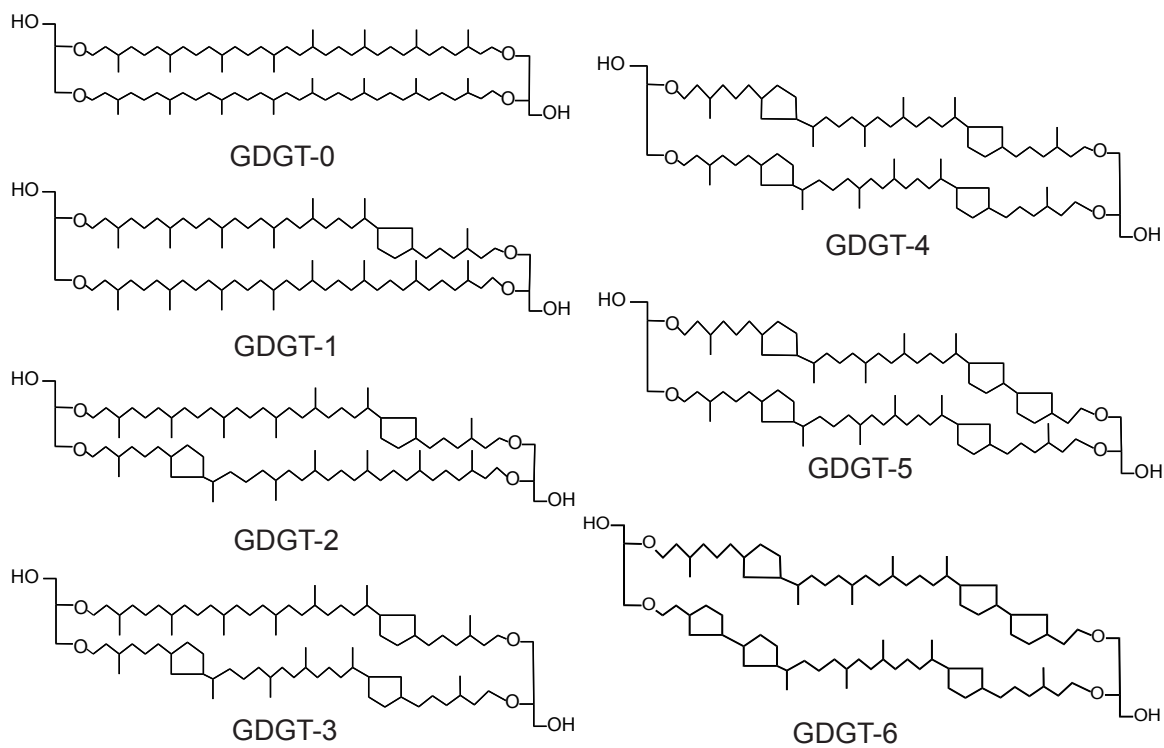

**Figure S1.** Core GDGT lipid structures with 0 to 6 pentacyclic rings produced by *S. acidocaldarius* and observed in this study.

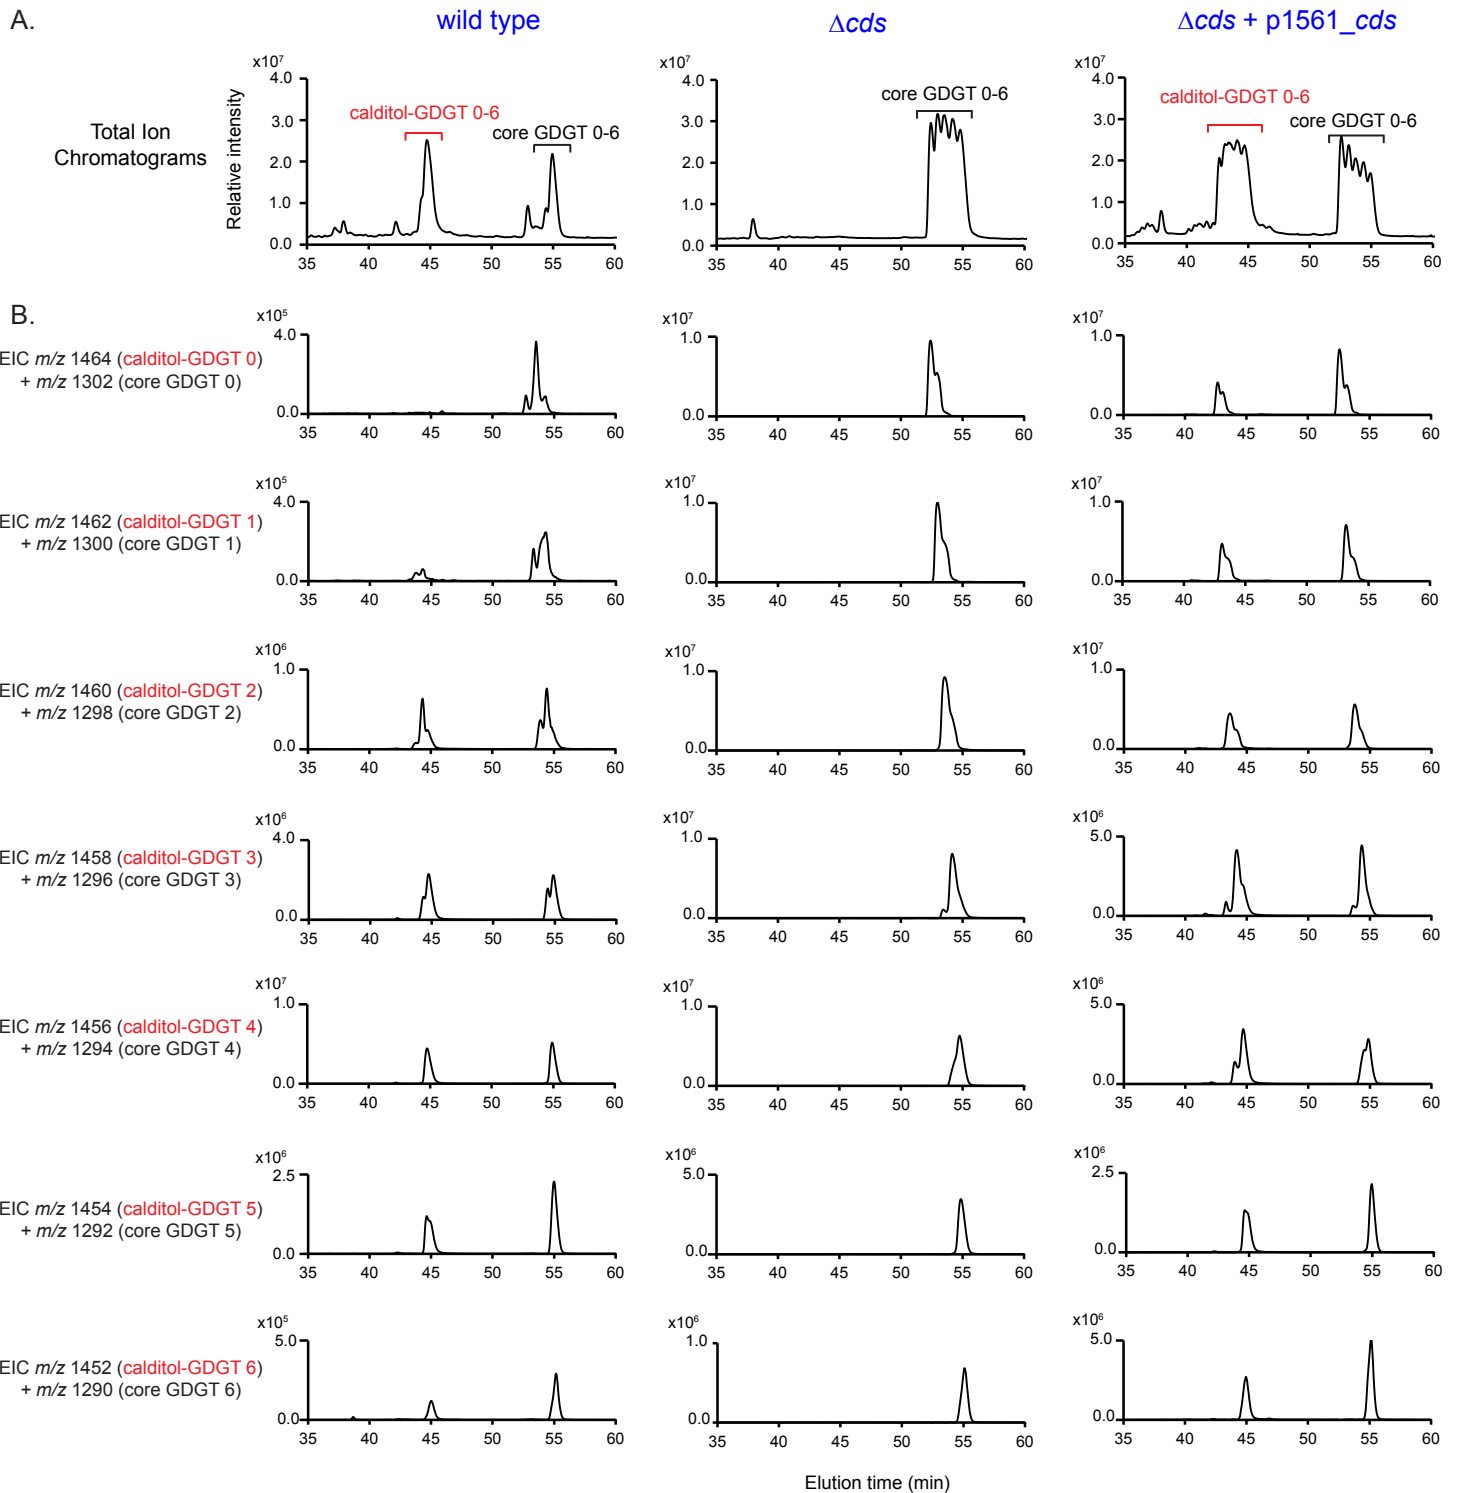

**Figure S2. LC-MS analyses of *Sulfolobus acidocaldarius* lipid extracts.** (A) Total ion chromatograms and (B) extracted ion chromatograms (EIC) of the acid hydrolyzed fractions from wild type,  $\Delta cds$ , and complemented  $\Delta cds$  cells. Note that the distribution of cyclized calditol-GDGT and core GDGT in wild type and mutant cells differ significantly. The exact nature of these differences and the reasons for this are currently under investigation.

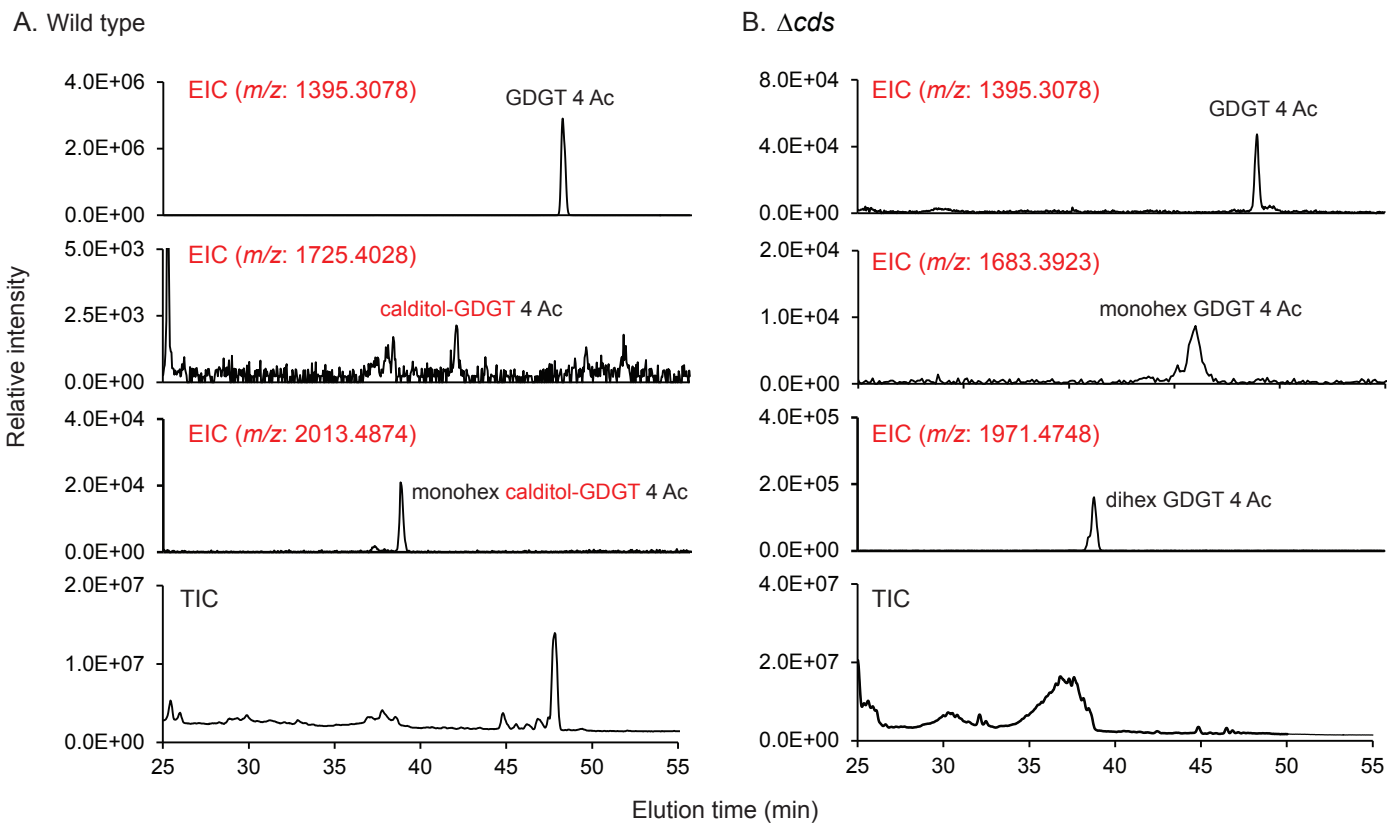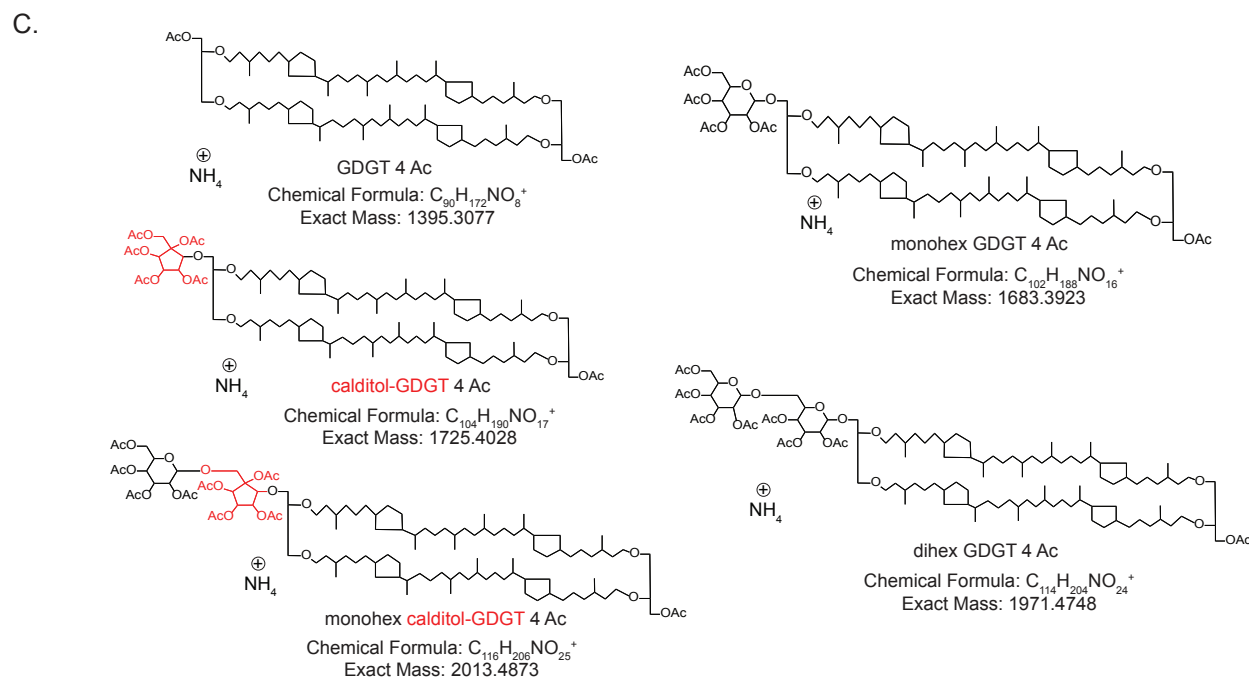

**Figure S3. The *S. acidocaldarius* *cds* mutant produces glycosylated GDGTs.** Total ion chromatograms (TIC) and extracted ion chromatograms (EIC) of acetylated non-hydrolyzed fractions from *S. acidocaldarius* (A) wild type and (B)  $\Delta cds$  cells showing that both strains glycosylate their core lipids but only the wild type contains calditol. Calditol head groups are distinguished from hexose head groups through acetylation as calditol contains an extra hydroxyl group which increases its mass by 42 Da. (C) Tetraether structures shown in EIC in panels A and B.

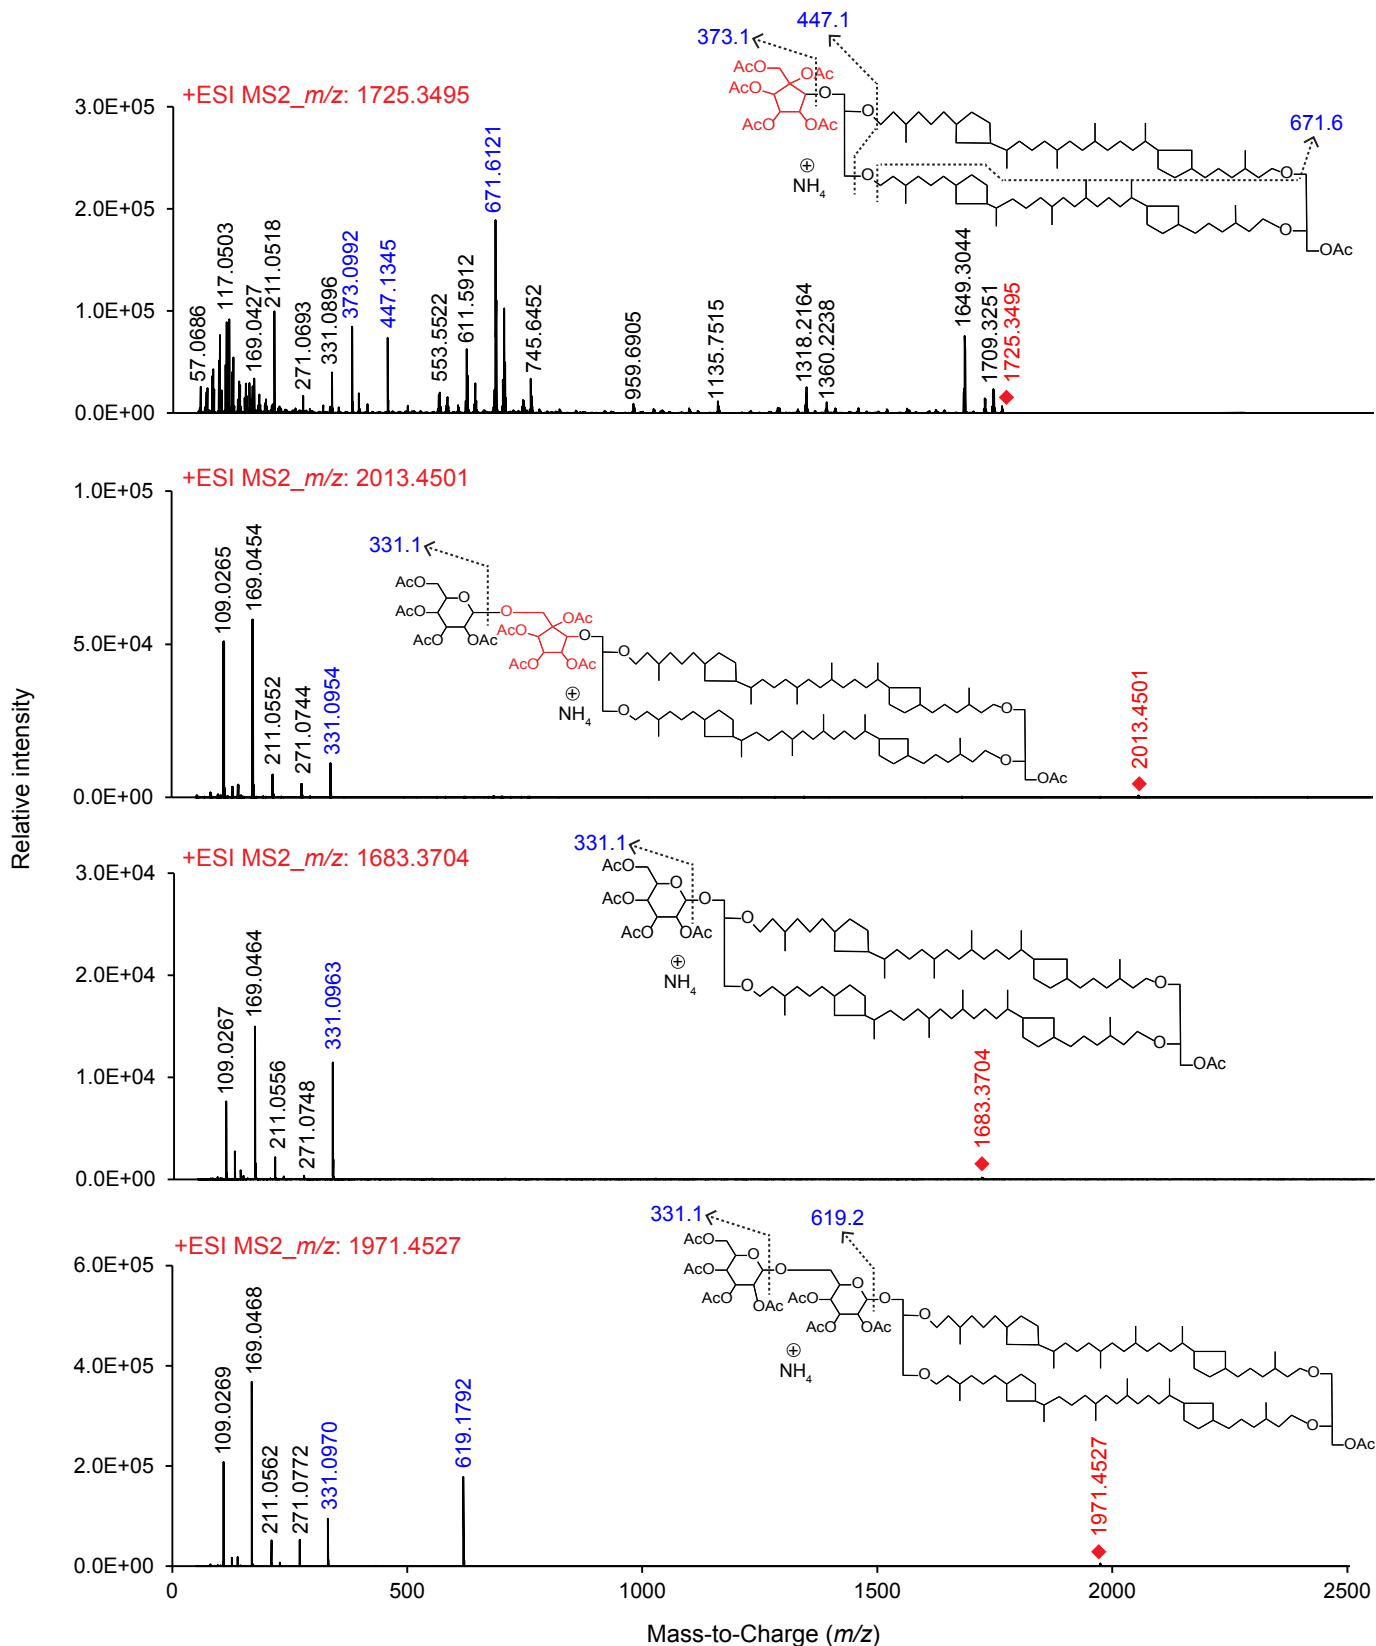

**Figure S4. Mass spectra of acetylated calditol-GDGTs and hexose-GDGTs.** MS/MS spectra of acetylated glycosidic GDGT-4 and calditol-GDGT-4 showing the characteristic fragments for their identification.



**Table S1. Proteins identified in *S. acidocaldarius* genome with a radical SAM motif (Pfam04055)**

| <b>IMG Gene ID</b> | <b>IMG Locus Tag</b> | <b>IMG Annotation</b>                              |
|--------------------|----------------------|----------------------------------------------------|
| 638197012          | Saci_0071            | conserved Archaeal protein                         |
| 638197176          | Saci_0240            | conserved Archaeal protein                         |
| 638197231          | Saci_0296            | predicted Fe-S oxidoreductases                     |
| 638197244          | Saci_0309            | lipoic acid synthetase                             |
| <b>638197278</b>   | <b>Saci_0343</b>     | <b>radical SAM domain protein</b>                  |
| <b>638197279</b>   | <b>Saci_0344</b>     | <b>radical SAM domain protein</b>                  |
| 638197309          | Saci_0374            | conserved Archaeal protein                         |
| 638197631          | Saci_0703            | conserved Archaeal radical SAM superfamily protein |
| 638197889          | Saci_0962            | universally conserved protein                      |
| 638197968          | Saci_1044            | conserved Archaeal protein                         |
| 638198063          | Saci_1141            | conserved Archaeal protein                         |
| 638198248          | Saci_1331            | conserved protein                                  |
| 638198392          | Saci_1479            | cyclic pyranopterin monophosphate synthase (MoaA)  |
| <b>638198402</b>   | <b>Saci_1489</b>     | <b>conserved Archaeal protein</b>                  |
| 638198497          | Saci_1585            | conserved Archaeal protein                         |
| 638198516          | Saci_1604            | conserved Archaeal protein                         |
| 638198543          | Saci_1632            | conserved Archaeal protein                         |
| 638198693          | Saci_1785            | conserved Prokaryal protein                        |

**Table S2. Sequences used to generate Cds phylogenetic tree**

| IMG Locus Tag           | IMG Genome ID | Genome Name                                                                                                                                             | GenBank Accession | NCBI Bioproject Accession | NCBI Biosample Accession |
|-------------------------|---------------|---------------------------------------------------------------------------------------------------------------------------------------------------------|-------------------|---------------------------|--------------------------|
| TB_LI09_3DRAFT_10005913 | 3300000229    | Groundwater microbial communities from subsurface biofilms in sulfidic aquifer in Frasassi Gorge, Italy, sample from two redox zones-LI09_3             | –                 | PRJNA336827               | SAMN05518261             |
| JGI2160J19893_100096772 | 3300001855    | Marine sediment microbial communities from White Oak River estuary, North Carolina - WOR-2-8_12                                                         | –                 | PRJNA366768               | SAMN06268482             |
| Ga0114920_100221603     | 3300009528    | Deep subsurface microbial communities from South Pacific Ocean to uncover new lineages of life (NeLLi) - Chile_00310 metaG                              | –                 | PRJNA405477               | SAMN07631026             |
| Ga0114921_101774722     | 3300009150    | Deep subsurface microbial communities from South Atlantic Ocean to uncover new lineages of life (NeLLi) - Benguela_00093 metaG                          | –                 | PRJNA367444               | SAMN06267295             |
| Ga0172363_100121925     | 3300013130    | Sediment microbial communities from Lake Kivu, Rwanda - Sediment s2_kivu2a2                                                                             | –                 | PRJNA404428               | SAMN07630773             |
| Ga0105105_102127021     | 3300009009    | Freshwater sediment microbial communities from Prairie Pothole Lake near Jamestown, North Dakota, USA - PPLs Lake P8 Core (1) Depth 1-3cm September2015 | –                 | PRJNA365086               | SAMN06264427             |
| Ga0129327_101115071     | 3300013010    | Freshwater to marine salinity gradient microbial communities from Chesapeake Bay, USA - CPBay_Spr_31_0.8_DNA                                            | –                 | PRJNA364792               | SAMN06264995             |
| Ga0099843_1258431       | 3300007155    | Iron oxide microbial mat communities from Yellowstone National Park, Wyoming, USA - ECH_C_top_diel_T=5 metaT (Metagenome Metatranscriptome)             | –                 | PRJNA365453               | SAMN06264516             |

|                              |            |                                                                                                                             |   |             |              |
|------------------------------|------------|-----------------------------------------------------------------------------------------------------------------------------|---|-------------|--------------|
| YNPsite14_CeleraDRAFT_106210 | 2022920007 | Hot spring microbial communities from One Hundred Springs Plain, Yellowstone National Park, Wyoming, USA - YNP14 OSP Spring | – | PRJNA337118 | SAMN05518158 |
| Ga0080003_10059782           | 3300005859 | Hot spring microbial communities from Joseph's Coat, Yellowstone National Park, USA - JC2_E (SPADES assembly)               | – | PRJNA366310 | SAMN06268698 |
| YNP1_75530                   | 2014031002 | Hot spring microbial communities from Yellowstone National Park, Wyoming, USA - YNP1 Alice Springs, Crater Hills            | – | PRJNA337120 | SAMN05518659 |
| Ga0079042_10009966           | 3300006181 | Hot spring microbial mat communities from Yellowstone National Park, Wyoming, USA - ECH_B nyco_MetaG                        | – | PRJNA375678 | SAMN06343748 |
| Ga0079041_10002292           | 3300006857 | Hot spring microbial mat communities from Yellowstone National Park, Wyoming, USA - ECH_B host_MetaG                        | – | PRJNA375677 | SAMN06343747 |
| Ga0167615_10056683           | 3300013009 | Extremophilic microbial mat communities from Yellowstone National Park, USA - BED_Mat_host_9_15 (v2)                        | – | PRJNA367343 | SAMN06267146 |
| Ga0182010_100210611          | 3300014490 | Permafrost microbial communities from Stordalen Mire, Sweden - 611E1M metaG                                                 | – | PRJNA406790 | SAMN07631786 |
| Ga0187772_100080051          | 3300018085 | Tropical peat soil microbial communities from peatlands in Department of Meta, Colombia - 0116_SJ02_MP15_20_MG              | – | PRJNA443517 | SAMN08776832 |
| Ga0187780_1000007610         | 3300017973 | Tropical peat soil microbial communities from peatlands in Department of Meta, Colombia - 1015_Q2_SP10_20_MG                | – | PRJNA443525 | SAMN08777027 |
| Ga0187770_100660741          | 3300018090 | Tropical peat soil microbial communities from peatlands in Department of Meta, Colombia - 0116_SJ02_MP02_20_MG              | – | PRJNA443515 | SAMN08776833 |

|                            |            |                                                                                                                                                                          |   |             |              |
|----------------------------|------------|--------------------------------------------------------------------------------------------------------------------------------------------------------------------------|---|-------------|--------------|
| JGI24147J26652_10017966    | 3300002103 | Arctic peat soil from Barrow, Alaska - Barrow Graham LP Incubations 11-33A                                                                                               | - | PRJNA330169 | SAMN05422026 |
| JGIcombinedJ26865_10164291 | 3300002347 | Arctic peat soil from Barrow, Alaska - NGEE Surface sample 415-1 deep-072012 (NGEE Surface samples 415 (1, 2, 3 deep-072012) AP id is 1030520, ASSEMBLY_DATE=20131219)   | - | PRJNA330294 | SAMN05421916 |
| JGI24721J44947_100034043   | 3300002966 | Hot spring thermophilic microbial communities from Obsidian Pool, Yellowstone National Park, USA - OP-RAMG-01                                                            | - | PRJNA366136 | SAMN06268369 |
| JGI20128J18817_100000859   | 3300001684 | Hot spring microbial communities from Joseph's Coat, Yellowstone National Park, USA - JC2_E                                                                              | - | PRJNA366310 | SAMN06268698 |
| Ga0180298_10149462         | 3300014869 | Subseafloor sediment microbial communities from Guaymas Basin, Gulf of California, Mexico - Guay13, Core 4488-10 , 4-6 cm                                                | - | PRJNA406717 | SAMN07632361 |
| Ga0116200_102257641        | 3300010332 | Marine hydrothermal vent microbial communities from Guaymas Basin, Gulf of California to study Microbial Dark Matter (Phase II) - Marker 14 Mat core 4571-4 3-6 cm metaG | - | PRJNA365032 | SAMN06264874 |
| Ga0164310_101961912        | 3300014913 | Subseafloor sediment microbial communities from Guaymas Basin, Gulf of California, Mexico - Guay1, Core 4569-9, 0-3 cm                                                   | - | PRJNA368383 | SAMN06269071 |
| Ga0190329_100035017        | 3300021494 | Hydrothermal vent sediment bacterial communities from Southern Trench, Guaymas Basin, Mexico - 4872-04-2-3_MG                                                            | - | PRJNA445005 | SAMN08777168 |
| Ga0080003_100005160        | 3300005859 | Hot spring microbial communities from Joseph's Coat, Yellowstone National Park, USA - JC2_E (SPADES assembly)                                                            | - | PRJNA366310 | SAMN06268698 |
| Ga0080003_10166501         | 3300005859 | Hot spring microbial communities from Joseph's Coat, Yellowstone                                                                                                         | - | PRJNA366310 | SAMN06268698 |

|                            |            |                                                                                                                                                   |              |             |              |
|----------------------------|------------|---------------------------------------------------------------------------------------------------------------------------------------------------|--------------|-------------|--------------|
|                            |            | National Park, USA - JC2_E (SPADES assembly)                                                                                                      |              |             |              |
| Ga0080006_11902124         | 3300005861 | Ferric oxide microbial mat and aquatic microbial communities from Rainbow Spring, Yellowstone National Park, USA - RS3B (SPADES assembly)         | -            | PRJNA366317 | SAMN06268705 |
| OneHSP_7476CDRAFT_10003425 | 3300000342 | Ferrous microbial mat communities from One Hundred Spring Plain, Yellowstone National Park, USA - T=74-76                                         | -            | PRJNA336650 | SAMN05518653 |
| Ga0079044_10017752         | 3300006855 | Hot spring microbial mat communities from Yellowstone National Park, Wyoming, USA - ECH_C host_MetaG                                              | -            | PRJNA375680 | SAMN06343750 |
| Ga0040879_1048251          | 3300003730 | Thermal spring microbial communities from Beowulf Spring, Yellowstone National Park, Wyoming, USA - Beowulf (BE_D) (Metagenome Metatranscriptome) | -            | PRJNA365740 | SAMN06267756 |
| JGI20133J14441_100012826   | 3300001340 | Ferric oxide microbial mat and aquatic microbial communities from Rainbow Spring, Yellowstone National Park, USA - RS3B                           | -            | PRJNA366317 | SAMN06268705 |
| JGI20133J14441_100004255   | 3300001340 | Ferric oxide microbial mat and aquatic microbial communities from Rainbow Spring, Yellowstone National Park, USA - RS3B                           | -            | PRJNA366317 | SAMN06268705 |
| YNP_08_myell_20060         | 2502894001 | <i>Metallosphaera archaeon</i>                                                                                                                    | -            | -           | -            |
| Ga0128346_103192           | 2681813019 | <i>Sulfolobus</i> sp. JCM 16833                                                                                                                   | -            | -           | PRJDB820     |
| ST1392                     | 638154519  | <i>Sulfolobus tokodaii</i> 7, JCM 10545                                                                                                           | BAB66459     | -           | PRJNA246     |
| Aboo_0737                  | 646564501  | <i>Aciduliprofundum boonei</i> T469                                                                                                               | YP_003483110 | -           | PRJNA38403   |
| MflrDRAFT_02178            | 2518645542 | <i>Methanoflorens stordalenmirensis</i>                                                                                                           | -            | -           | -            |
| Ga0128335_100238           | 2681813032 | <i>Sulfolobus metallicus</i> DSM 6482, JCM 9184                                                                                                   | -            | -           | PRJDB806     |
| Ga0172927_111534           | 2728369534 | <i>Sulfolobus</i> sp. A20                                                                                                                         | -            | -           | PRJNA339201  |
| Ga0199187_11746            | 2740892001 | <i>Acidianus manzaensis</i> YN-25                                                                                                                 | -            | -           | PRJNA380321  |

|                   |            |                                                                                 |              |             |              |
|-------------------|------------|---------------------------------------------------------------------------------|--------------|-------------|--------------|
| CM19_05805        | 2574180086 | <i>Candidatus</i> Acidianus copahuensis<br>ALE1                                 | –            | –           | PRJNA240874  |
| Ga0180371_11429   | 2721755441 | Unclassified Crenarchaeota ZZQ<br>bin_1                                         | –            | –           | –            |
| ASUL_01974        | 2588254065 | <i>Sulfolobales</i> archaeon AZ1                                                | –            | –           | PRJNA198460  |
| Mcup_0901         | 650716051  | <i>Metallosphaera cuprina</i> Ar-4                                              | YP_004409490 | –           | PRJNA65497   |
| Ahos_1265         | 650716001  | <i>Acidianus hospitalis</i> W1                                                  | YP_004458446 | –           | PRJNA60875   |
| AciM339_0328      | 2508501109 | <i>Aciduliprofundum</i> sp. MAR08-339                                           | –            | –           | PRJNA73039   |
| NAG2ff85r04_00864 | 2524023239 | NAG2_ff85-r04                                                                   | –            | –           | –            |
| A474_10477        | 2514885039 | <i>Sulfolobales</i> sp. HSU1                                                    | –            | –           | –            |
| Myr05_01008       | 2551306706 | <i>Metallosphaera yellowstonensis</i> r05                                       | –            | –           | –            |
| Ga0100943_111650  | 2645727535 | <i>Metallosphaera sedula</i> ARS120-2                                           | –            | –           | PRJNA289699  |
| Ga0081668_111464  | 2648501262 | <i>Sulfolobus solfataricus</i> SULA                                             | –            | –           | PRJNA279935  |
| Ga0126086_11463   | 2684622731 | <i>Sulfolobus acidocaldarius</i><br>NG05B_CO5_10                                | –            | –           | PRJNA304349  |
| Ga0180374_106163  | 2721755443 | <i>Sulfolobus</i> sp. ZZQ bin_3_2nd                                             | –            | –           | –            |
| –                 | –          | <i>Candidatus</i> Marsarchaeota G1<br>archaeon BE_D (taxid:1978158)             | PSN85745.1   | PRJNA362583 | SAMN06639946 |
| –                 | –          | <i>Candidatus</i> Marsarchaeota G2<br>archaeon OSP_D (taxid:1978157)            | PSN91903.1   | PRJNA362583 | SAMN06639947 |
| –                 | –          | <i>Candidatus</i> Marsarchaeota G2<br>archaeon ECH_B_SAG-G16<br>(taxid:1978167) | PSN97909.1   | PRJNA362583 | SAMN06639953 |
| –                 | –          | <i>Candidatus</i> Korarchaeota archaeon                                         | PMB77276.1   | PRJNA419931 | SAMN08107309 |

**Table S3. Ecological characteristics of metagenomes with Cds hits**

| <b>Ecosystem Category</b> | <b>Ecosystem Subtype</b> | <b>Ecosystem Type</b>          | <b>Habitat</b>                       | <b>No. of Cds hits</b> |    |
|---------------------------|--------------------------|--------------------------------|--------------------------------------|------------------------|----|
| Aquatic                   | Alkaline                 | Non-marine Saline and Alkaline | Hypoxic/sulfidic aquatic             | 1                      |    |
|                           | Coastal                  | Marine                         | Freshwater to marine saline gradient | 5                      |    |
|                           | Groundwater              | Freshwater                     | Groundwater                          | 1                      |    |
|                           | Hot (42-90°C)            | Thermal springs                | Acidic hot water                     |                        | 3  |
|                           |                          |                                | Ferric mat                           |                        | 4  |
|                           |                          |                                | Hot spring                           |                        | 97 |
|                           |                          |                                | Hypersaline mat                      |                        | 16 |
|                           |                          |                                | Microbial mats                       |                        | 14 |
|                           |                          |                                | Thermal spring                       |                        | 21 |
|                           | Hydrothermal vents       | Marine                         | Marine sediment                      | 21                     |    |
|                           | Hypersaline              | Non-marine Saline and Alkaline | Hot spring                           | 13                     |    |
|                           | Lake                     | Freshwater                     | Anoxic zone freshwater               |                        | 2  |
|                           |                          |                                | Sediment                             |                        | 8  |
|                           | Oceanic                  | Marine                         | Deep subsurface                      |                        | 2  |
|                           |                          |                                | Marine sediment                      |                        | 2  |
|                           | Unclassified             | Non-marine Saline and Alkaline | Ferric oxide microbial mat           |                        | 7  |
|                           |                          |                                | Ferrous mat                          |                        | 21 |
| Wetlands                  | Freshwater               | Bog                            |                                      | 11                     |    |
|                           |                          | Peatland                       |                                      | 123                    |    |
| Terrestrial               | Unclassified             | Soil                           | Peat                                 |                        | 18 |
|                           |                          |                                | Arctic peat soil                     |                        | 69 |
|                           |                          |                                | Permafrost                           |                        | 2  |
|                           |                          |                                | Soil                                 |                        | 13 |
|                           | Wetlands                 | Soil                           | Bog                                  |                        | 2  |
|                           |                          |                                | Fen                                  |                        | 11 |
|                           |                          |                                | Tropical peatland                    |                        | 25 |

**Table S4. Strains used in this study**

| Strains                          |         | Genotype                                                                                                                                   | Sources or reference  |
|----------------------------------|---------|--------------------------------------------------------------------------------------------------------------------------------------------|-----------------------|
| <i>Escherichia coli</i>          | DH10B   | F <sup>-</sup> <i>endA1 recA1 galE15 galK16 nup GrpsL ΔlacX74 Φ80lacZΔM15 araD139 Δ(ara,leu)7697 mcrA Δ(mrr-hsdRMS-mcrBC)λ<sup>-</sup></i> | D.K. Newman (Caltech) |
|                                  | ER1821  | F <sup>-</sup> <i>glnV44 e14(McrA<sup>-</sup>) rfbD1 relA1 endA1 spoT1 thi-1 Δ(mcrC- mrr)114::IS10</i>                                     | New England Biolabs   |
| <i>Sulfolobus acidocaldarius</i> | MW001   | <i>ΔpyrE</i> (uracil auxotrophic parent strain)                                                                                            | (2)                   |
|                                  | ZZsa001 | MW001 + pSVA1561                                                                                                                           | This work             |
|                                  | ZZsa002 | MW001 <i>Δsaci_0343</i>                                                                                                                    | This work             |
|                                  | ZZsa003 | MW001 <i>Δsaci_1489</i>                                                                                                                    | This work             |
|                                  | ZZsa004 | MW001 <i>Δsaci_1489</i> + pSVA1561                                                                                                         | This work             |
|                                  | ZZsa005 | MW001 <i>Δsaci_1489</i> + pSVA1561- <i>saci_1489</i>                                                                                       | This work             |



**Table S5. Plasmids used in this study**

| <b>Plasmids</b>              | <b>Description</b>                                                                                                                                                                                                                                                                                | <b>Source or reference</b> |
|------------------------------|---------------------------------------------------------------------------------------------------------------------------------------------------------------------------------------------------------------------------------------------------------------------------------------------------|----------------------------|
| pSVA407                      | <i>S. acidocaldarius</i> deletion plasmid                                                                                                                                                                                                                                                         | (2)                        |
| pSVA1561                     | <i>S. acidocaldarius</i> expression plasmid                                                                                                                                                                                                                                                       | (2)                        |
| pSVA407- <i>saci_1489</i> UD | Deletion plasmid containing <i>saci_1489</i> upstream and downstream regions for <i>saci_1489</i> deletion. The upstream and downstream regions were amplified by PCR with primers Z001F/R, and Z002F/R, respectively, and cloned into the <i>NcoI</i> and <i>BamHI</i> sites of pSVA407 plasmid. | This work                  |
| pSVA407- <i>saci_0343</i> UD | Deletion plasmid containing <i>saci_0343</i> upstream and downstream regions for <i>saci_0343</i> deletion. The upstream and downstream regions were amplified by PCR with primers Z004F/R, and Z005F/R, respectively, and cloned into the <i>NcoI</i> and <i>BamHI</i> sites of pSVA407 plasmid. | This work                  |
| pSVA1561- <i>saci_1489</i>   | $\Delta$ <i>saci_1489</i> mutant complementation plasmid. The <i>saci_1489</i> gene was amplified by PCR with primers Z003F/R, and cloned into the <i>NcoI</i> and <i>XhoI</i> site of pSVA1561 plasmid.                                                                                          | This work                  |

**Table S6. Primers used in this study**

| <b>Primers</b> | <b>Sequence (5' to 3')</b>                                | <b>Notes</b>                                      |
|----------------|-----------------------------------------------------------|---------------------------------------------------|
| Z001F          | CCCGACGTCGCATGCTCCCGGCCGCATTTATCAAG<br>TTATCAAAAACAATT    | <i>saci_1489</i><br>upstream cloning<br>forward   |
| Z001R          | ATTTGGTTAGGCTCTTCTATTTCATAATTTAAGAAACC<br>TC              | <i>saci_1489</i><br>upstream cloning<br>reverse   |
| Z002F          | AAATTATGAATAGAAGAGCCTAACCAAATGTATTTTT<br>AT               | <i>saci_1489</i><br>downstream cloning<br>forward |
| Z002R          | TACTAGAACTGCTCAAACCTAGGTCAGAGTAACTAA<br>TTCAGACGTAAACGC   | <i>saci_1489</i><br>downstream cloning<br>reverse |
| Z003F          | ATAAATAATTACGTGATTAAGTTAACCATGAATAGAG<br>ATATTAAGCGTTTAGA | Complementation<br><i>saci_1489</i> forward       |
| Z003R          | CCCTTAATGGTGATGATGGTGATGTTAGGCTCTACC<br>TAAAAATCTCC       | Complementation<br><i>saci_1489</i> reverse       |
| Z004F          | CCCGACGTCGCATGCTCCCGGCCGCGAGATAAGG<br>GGATAATACTCTCAGG    | <i>saci_0343</i><br>upstream cloning<br>forward   |
| Z004R          | AATATACATGGACATAGTCATGAAACACCACCTGA                       | <i>saci_0343</i><br>upstream cloning<br>reverse   |
| Z005F          | TGGTGTTTCATGACTATGTCCATGTATATTCCTACTG<br>GTT              | <i>saci_0343</i><br>downstream cloning<br>forward |
| Z005R          | TACTAGAACTGCTCAAACCTAGGTCAGAGATTGGTT<br>TATTTTCCAAAACC    | <i>saci_0343</i><br>downstream cloning<br>reverse |
| Z006 F         | ATGACAAGAAAAACAAAGAAGATTTA                                | <i>saci_1489</i> deletion<br>check forward        |
| Z006R          | CGCAATAAAGGATTTCTAGAT                                     | <i>saci_1489</i> deletion<br>check reverse        |
| Z007F          | GTGCCTTTAATTGTAAACATTGTG                                  | <i>saci_0343</i> deletion<br>check forward        |
| Z007R          | AAGTCTATTAAGTCTCCCTCTTCCA                                 | <i>saci_0343</i> deletion<br>check reverse        |

## SI Appendix References

1. Li MZ & Elledge SJ (2012) SLIC: a method for sequence- and ligation-independent cloning. *Methods Mol Biol* 852:51-59.
2. Wagner M, van Wolferen M, Wagner A, Lassak K, Meyer BH, Reimann J, & Albers SV (2012) Versatile Genetic Tool Box for the Crenarchaeote *Sulfolobus acidocaldarius*. *Front Microbiol* 3:214.
3. Hoffmann L, Schummer A, Reimann J, Haurat MF, Wilson AJ, Beeby M, Warscheid B, & Albers SV (2017) Expanding the archaeellum regulatory network - the eukaryotic protein kinases ArnC and ArnD influence motility of *Sulfolobus acidocaldarius*. *Microbiologyopen* 6(1):e00414.
4. Huguet C, Hopmans EC, Febo-Ayala W, Thompson DH, Damste JSS, & Schouten S (2006) An improved method to determine the absolute abundance of glycerol dibiphytanyl glycerol tetraether lipids. *Organic Geochemistry* 37(9):1036-1041.
